# Supplementary material for: Effect of Copolymer Properties on the Phase Behavior of Ibuprofen–PLA/PLGA Mixtures
Source: MDPI journal article supplement (doi:10.3390/pharmaceutics15020645), 2023-02-14
Supplement: s1 [file s1]

Supplementary Materials

# Effect of copolymer properties on the phase behavior of ibuprofen-PLA/PLGA mixtures

Anton Iemtsev<sup>1</sup>, Martin Klajmon<sup>1</sup>, Fatima Hassouna<sup>2</sup>, Michal Fulem<sup>1,\*</sup>

<sup>1</sup> Department of Physical Chemistry, University of Chemistry and Technology, Prague, Technická 5, 166 28 Prague 6, Czech Republic

<sup>2</sup> Faculty of Chemical Engineering, University of Chemistry and Technology, Prague, Technická 5, 166 28 Prague 6, Czech Republic

\* Correspondence: fulemm@vscht.cz

**Table S1.**  $T_s$  values obtained for IBU–PLGA and IBU–PLA systems.

|              | PDLG 5004A | PDLG 7504A | PDL 02A | PDL 04A |
|--------------|------------|------------|---------|---------|
| IBU (wt. %): | $T_s$      |            |         |         |
| 20           | 74.8       | –          | –       | –       |
| 30           | 75.0       | 75.5       | 74.0    | 75.0    |
| 40           | –          | –          | 74.7    | 74.9    |
| 50           | 75.5       | 75.6       | 74.6    | 75.1    |
| 70           | 75.4       | 75.7       | 74.8    | 75.2    |

**Table S2(a).**  $T_g$  values obtained for IBU–PDLG 5004A system annealed at 80–150 °C.

| IBU (wt. %):      | 10       | 20       |          | 30       |          | 50       |          | 70       |          |
|-------------------|----------|----------|----------|----------|----------|----------|----------|----------|----------|
| Temperature (°C): | $T_{g1}$ | $T_{g1}$ | $T_{g2}$ | $T_{g1}$ | $T_{g2}$ | $T_{g1}$ | $T_{g2}$ | $T_{g1}$ | $T_{g2}$ |
| 80                | 44.7     | −41.4    | 43.4     | −42.3    | 45.0     | −42.7    | 45.7     | −42.5    | 45.6     |
| 90                |          | −41.4    | 43.0     | −41.7    | 44.4     | −42.6    | 45.8     | −42.7    | 43.2     |
| 100               |          | −41.7    | 42.6     | −41.4    | 43.2     | −42.4    | 36.6     | −42.3    | 41.5     |
| 110               |          | −41.2    | 37.6     | −41.6    | 40.9     | −41.9    | 35.9     | −42.4    | 40.5     |
| 120               |          | 35.2     | −        | 36       | −        | −42.1    | 35.6     | −42.1    | 36.3     |
| 130               |          | 34.4     | −        | 34.7     | −        | −42.4    | 35       | −42.3    | 35.1     |
| 140               |          | 34.9     | −        | 34.4     | −        | −42.1    | 35.3     | −42.4    | 34.9     |
| 150               |          | 34.3     | −        | 34.9     | −        | −42.4    | 35       | −41.8    | 35.3     |

**Table S2(b).**  $T_g$  values obtained for IBU–PDLG 7504A system annealed at 80-150 °C.

| IBU (wt. %):      | 10       | 20       | 30       |          | 50       |          | 70       |          |
|-------------------|----------|----------|----------|----------|----------|----------|----------|----------|
| Temperature (°C): | $T_{g1}$ | $T_{g1}$ | $T_{g1}$ | $T_{g2}$ | $T_{g1}$ | $T_{g2}$ | $T_{g1}$ | $T_{g2}$ |
| 80                | 48.3     | 48.2     | −40.7    | 48.2     | −42.1    | 48.2     | −43.2    | 32.3     |
| 90                |          |          | −41.7    | 48.4     | −41.8    | 48.6     | −43.0    | 31.5     |
| 100               |          |          | −39.3    | 46.6     | −41.9    | 47.4     | −43.0    | 31.0     |
| 110               |          |          | 40.2     | —        | −41.3    | 35.9     | −42.8    | 29.4     |
| 120               |          |          | 39.3     | —        | −41.8    | 30.0     | −42.9    | 28.5     |
| 130               |          |          | 39.7     | —        | 27.5     | —        | −42.2    | 27.7     |
| 140               |          |          | 40.6     | —        | 27.6     | —        | −43.4    | 27.4     |
| 150               |          |          | 40.6     | —        | 28.6     | —        | −44.3    | 27.8     |

**Table S2(c).**  $T_g$  values obtained for IBU–PDL 02A system annealed at 80-150 °C.

| IBU (wt. %):      | 10       | 20       | 30       | 40       |          | 50       |          | 70       |          |
|-------------------|----------|----------|----------|----------|----------|----------|----------|----------|----------|
| Temperature (°C): | $T_{g1}$ | $T_{g1}$ | $T_{g1}$ | $T_{g1}$ | $T_{g2}$ | $T_{g1}$ | $T_{g2}$ | $T_{g1}$ | $T_{g2}$ |
| 80                | 31.6     | 17.3     | 15.2     | −44.2    | 12.3     | −44.7    | 13.5     | −43.3    | 12.7     |
| 90                |          |          |          | −44.7    | 11.9     | −44.3    | 12.5     | −43.2    | 11.4     |
| 100               |          |          |          | −44.1    | 11.0     | −44.2    | 12.5     | −43.3    | 11.5     |
| 110               |          |          |          | −44.8    | 12.2     | −43.8    | 13.2     | −43.1    | 12.4     |
| 120               |          |          |          | −44.7    | 10.9     | −44.1    | 11.8     | −43.1    | 12.1     |
| 130               |          |          |          | −44.7    | 13.0     | −44.3    | 11.1     | −43.7    | 12.4     |
| 140               |          |          |          | −44.6    | 13.2     | −44.6    | 11.2     | −43.1    | 11.9     |
| 150               |          |          |          | −45.6    | 11.5     | −44.6    | 11.4     | −43.4    | 12.5     |

**Table S2(d).**  $T_g$  values obtained for IBU–PDL 04A system annealed at 80-150 °C.

| IBU (wt. %):      | 10       | 20       | 30       | 40       |          | 50       |          | 70       |          |
|-------------------|----------|----------|----------|----------|----------|----------|----------|----------|----------|
| Temperature (°C): | $T_{g1}$ | $T_{g1}$ | $T_{g1}$ | $T_{g1}$ | $T_{g2}$ | $T_{g1}$ | $T_{g2}$ | $T_{g1}$ | $T_{g2}$ |
| 80                | 44.1     | 37.4     | 26.1     | −44.8    | 16.4     | −43.1    | 15.4     | −42.4    | 17.1     |
| 90                |          |          |          | −45.2    | 14.8     | −44.1    | 15.4     | −42.7    | 15.6     |
| 100               |          |          |          | −44.9    | 16.2     | −43.8    | 16.4     | −43.6    | 15.8     |
| 110               |          |          |          | −45.1    | 15.7     | −44.4    | 16.6     | −44.0    | 15.2     |
| 120               |          |          |          | −44.8    | 14.9     | −45.9    | 18.3     | −44.3    | 14.9     |
| 130               |          |          |          | 16.0     | —        | 16.1     | —        | −45.1    | 15.6     |
| 140               |          |          |          | 15.1     | —        | 16.3     | —        | −44.5    | 14.5     |
| 150               |          |          |          | 16.1     | —        | 15.8     | —        | −45.2    | 16.1     |

**Table S3.** Parameters  $k$  and  $q$  of the Kwei equation ((Equation (1) in the main article) for IBU–PLGA and IBU–PLA systems.

| Polymer    | $k$      | $q$       |
|------------|----------|-----------|
| PDLG 5002A | 0.22025  | 232.97454 |
| PDLG 5004A | 0.33251  | 232.97454 |
| PDLG 7502A | 0.99972  | 14.91052  |
| PDLG 7504A | 26.72092 | 5.39933   |
| PDL 02A    | 0.24938  | 117.51721 |
| PDL 04A    | 0.99909  | 27.99866  |

**Table S4.** AARD ( $w_{API}$ )<sup>a</sup> values between experimental SLE data and data calculated using PC-SAFT EOS for all IBU–PLGA and IBU–PLA systems.

| Polymer    | All $k_{ij} = 0$ | Optimized $k_{ij}$ s <sup>b</sup> |
|------------|------------------|-----------------------------------|
| PDLG 5002A | 109              | 27.9                              |
| PDLG 5004A | 157              | 33.4                              |
| PDLG 7502A | 93               | 29.7                              |
| PDLG 7504A | 121              | 27.3                              |
| PDL 02A    | 95               | 23.3                              |
| PDL 04A    | 105              | 28.6                              |

<sup>a</sup> AARD denotes the average absolute relative deviation:

$$\text{AARD} = 100N^{-1} \sum_{i=1}^N \left| (w_{API}^{\text{exp}} - w_{API}^{\text{calc}}) / w_{API}^{\text{exp}} \right|; w_{API} \text{ is the API solubility (mass fraction), “exp” and “calc” denote the experimental values and those calculated using PC-SAFT EOS, respectively, and } N \text{ is the number of experimental data points.}$$

<sup>b</sup> The respective optimized  $k_{ij}$  values are shown in Table S5.

**Table S5.** PC-SAFT EOS binary interaction parameters,  $k_{ij}$ , between the IBU and the different monomer units of PLGA/PLA polymers.

| Polymer                          | $k_{ij}$ (LLA and DLA) | $k_{ij}$ (GA) |
|----------------------------------|------------------------|---------------|
| PDLG 5002A/5004A and 7502A/5004A | 0.030                  | 0.042         |
| PDL 02A and 04A                  | 0.030                  | -             |
